# Supplementary material
Source: PubMed Central journal article supplement (PMC7546216)
Supplement: NIHMS1500203-supplement-1.pdf [file NIHMS1500203-supplement-1.pdf]

## Supplemental Materials: How Interpersonal Coordination Affects Individual Behavior (and Vice Versa)

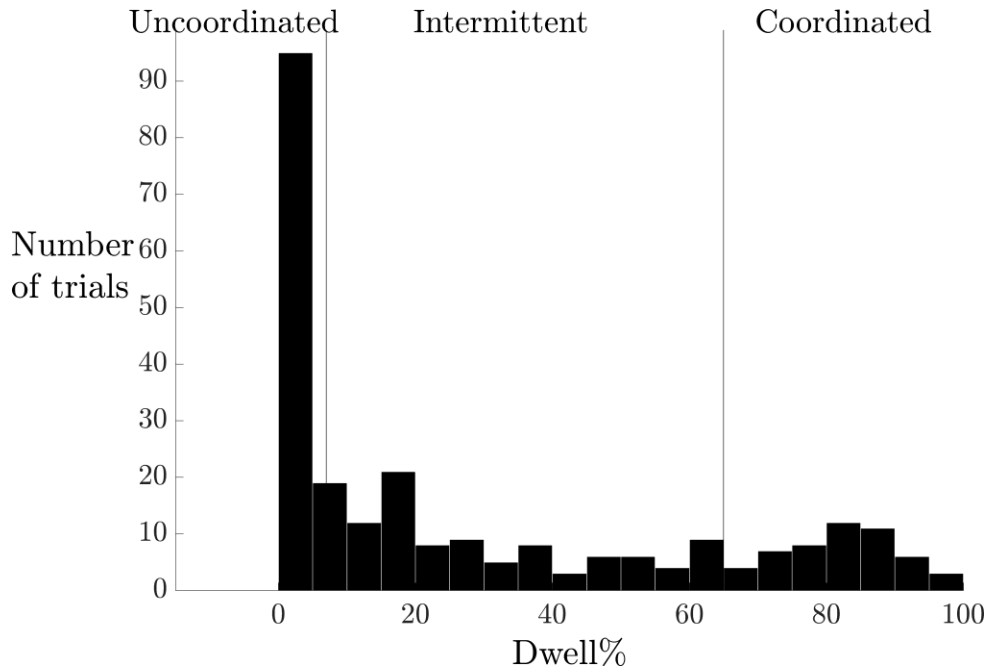

*Figure 14.* Coordination patterns categorized by Dwell%: Coordination pattern was determined by the percent of time partners' relative phase dwelled (i.e. approached coordination stability). Thresholds were set at 7 and 65%.
